# Supplementary material for: Fuzzy logic trust management framework for Cyber Physical-Social Systems (FTM-CPSS)
Source: PeerJ journal article supplement (doi:10.7717/peerj-cs.3164), 2025-12-16
Supplement: code.docx [file code.docx]

[System]

Name='Overall Trust'

Type='mamdani'

Version=2.0

NumInputs=5

NumOutputs=1

NumRules=72

AndMethod='min'

OrMethod='max'

ImpMethod='min'

AggMethod='max'

DefuzzMethod='centroid'

[Input1]

Name='SLA'

Range=[0 100]

NumMFs=3

MF1='LOW':'trapmf',[0 0 20 40]

MF2='MEDIUM':'trapmf',[30 40 60 70]

MF3='HIGH':'trapmf',[60 70 100 100]

[Input2]

Name='processing_Performance'

Range=[0 100]

NumMFs=3

MF1='LOW':'trapmf',[0 0 20 40]

MF2='MEDIUM':'trapmf',[30 40 60 70]

MF3='HIGH':'trapmf',[60 70 100 100]

[Input3]

Name='Social_Reputation'

Range=[0 100]

NumMFs=2

MF1='LOW':'trapmf',[0 0 40 60]

MF2='HIGH':'trapmf',[40 60 100 100]

[Input4]

Name='Security_Issues'

Range=[0 100]

NumMFs=2

MF1='NO':'trapmf',[0 0 40 60]

MF2='YES':'trapmf',[40 60 100 100]

[Input5]

Name='Violations_Measurement'

Range=[0 100]

NumMFs=2

MF1='NO':'trapmf',[0 0 40 60]

MF2='YES':'trapmf',[40 60 100 100]

[Output1]

Name='Overall_Trust'

Range=[0 100]

NumMFs=4

MF1='LOW':'trapmf',[0 0 20 30]

MF2='MEDIUM':'trapmf',[20 30 50 60]

MF3='HIGH':'trapmf',[50 60 80 90]

MF4='EXCELLENT':'trapmf',[80 90 100 100]

[Rules]

1 1 1 1 1, 2 (1) : 1

1 1 1 1 2, 1 (1) : 1

1 1 1 2 1, 1 (1) : 1

1 1 1 2 2, 1 (1) : 1

1 1 2 1 1, 3 (1) : 1

1 1 2 1 2, 2 (1) : 1

1 1 2 2 1, 2 (1) : 1

1 1 2 2 2, 2 (1) : 1

1 2 1 1 1, 2 (1) : 1

1 2 1 1 2, 2 (1) : 1

1 2 1 2 1, 2 (1) : 1

1 2 1 2 2, 1 (1) : 1

1 2 2 1 1, 3 (1) : 1

1 2 2 1 2, 2 (1) : 1

1 2 2 2 1, 2 (1) : 1

1 2 2 2 2, 2 (1) : 1

1 3 1 1 1, 3 (1) : 1

1 3 1 1 2, 2 (1) : 1

1 3 1 2 1, 2 (1) : 1

1 3 1 2 2, 1 (1) : 1

1 3 2 1 1, 3 (1) : 1

1 3 2 1 2, 2 (1) : 1

1 3 2 2 1, 2 (1) : 1

1 3 2 2 2, 1 (1) : 1

2 1 1 1 1, 2 (1) : 1

2 1 1 1 2, 1 (1) : 1

2 1 1 2 1, 1 (1) : 1

2 1 1 2 2, 1 (1) : 1

2 1 2 1 1, 3 (1) : 1

2 1 2 1 2, 2 (1) : 1

2 1 2 2 1, 2 (1) : 1

2 1 2 2 2, 2 (1) : 1

2 2 1 1 1, 2 (1) : 1

2 2 1 1 2, 2 (1) : 1

2 2 1 2 1, 2 (1) : 1

2 2 1 2 2, 1 (1) : 1

2 2 2 1 1, 3 (1) : 1

2 2 2 1 2, 2 (1) : 1

2 2 2 2 1, 2 (1) : 1

2 2 2 2 2, 2 (1) : 1

2 3 1 1 1, 3 (1) : 1

2 3 1 1 2, 2 (1) : 1

2 3 1 2 1, 2 (1) : 1

2 3 1 2 2, 1 (1) : 1

2 3 2 1 1, 3 (1) : 1

2 3 2 1 2, 2 (1) : 1

2 3 2 2 1, 2 (1) : 1

2 3 2 2 2, 1 (1) : 1

3 1 1 1 1, 3 (1) : 1

3 1 1 1 2, 2 (1) : 1

3 1 1 2 1, 2 (1) : 1

3 1 1 2 2, 1 (1) : 1

3 1 2 1 1, 3 (1) : 1

3 1 2 1 2, 2 (1) : 1

3 1 2 2 1, 2 (1) : 1

3 1 2 2 2, 2 (1) : 1

3 2 1 1 1, 3 (1) : 1

3 2 1 1 2, 2 (1) : 1

3 2 1 2 1, 2 (1) : 1

3 2 1 2 2, 1 (1) : 1

3 2 2 1 1, 3 (1) : 1

3 2 2 1 2, 3 (1) : 1

3 2 2 2 1, 3 (1) : 1

3 2 2 2 2, 2 (1) : 1

3 3 1 1 1, 3 (1) : 1

3 3 1 1 2, 2 (1) : 1

3 3 1 2 1, 2 (1) : 1

3 3 1 2 2, 2 (1) : 1

3 3 2 1 2, 3 (1) : 1

3 3 2 2 1, 3 (1) : 1

3 3 2 2 2, 2 (1) : 1

3 3 2 1 1, 4 (1) : 1
