# Supplementary material for: Fuzzy logic trust management framework for Cyber Physical-Social Systems (FTM-CPSS)
Source: PeerJ journal article supplement (doi:10.7717/peerj-cs.3164), 2025-12-16
Supplement: Fuzzy_Inference_System_Rules.docx [file Fuzzy_Inference_System_Rules.docx]

**Fuzzy Inference System Rules**

| **Rule No.** | **SLA** | **PP** | **SR** | **SI** | **VM** | **Overall Trust** |
| --- | --- | --- | --- | --- | --- | --- |
| 1 | L | L | L | N | N | M |
| 2 | L | L | L | N | Y | L |
| 3 | L | L | L | Y | N | L |
| 4 | L | L | L | Y | Y | L |
| 5 | L | L | H | N | N | H |
| 6 | L | L | H | N | Y | M |
| 7 | L | L | H | Y | N | M |
| 8 | L | L | H | Y | Y | M |
| 9 | L | M | L | N | N | M |
| 10 | L | M | L | N | Y | M |
| 11 | L | M | L | Y | N | M |
| 12 | L | M | L | Y | Y | L |
| 13 | L | M | H | N | N | H |
| 14 | L | M | H | N | Y | M |
| 15 | L | M | H | Y | N | M |
| 16 | L | M | H | Y | Y | M |
| 17 | L | H | L | N | N | H |
| 18 | L | H | L | N | Y | M |
| 19 | L | H | L | Y | N | M |
| 20 | L | H | L | Y | Y | L |
| 21 | L | H | H | N | N | H |
| 22 | L | H | H | N | Y | M |
| 23 | L | H | H | Y | N | M |
| 24 | L | H | H | Y | Y | L |
| 25 | M | L | L | N | N | M |
| 26 | M | L | L | N | Y | L |
| 27 | M | L | L | Y | N | L |
| 28 | M | L | L | Y | Y | L |
| 29 | M | L | H | N | N | H |
| 30 | M | L | H | N | Y | M |
| 31 | M | L | H | Y | N | M |
| 32 | M | L | H | Y | Y | M |
| 33 | M | M | L | N | N | M |
| 34 | M | M | L | N | Y | M |
| 35 | M | M | L | Y | N | M |
| 36 | M | M | L | Y | Y | L |
| 37 | M | M | H | N | N | H |
| 38 | M | M | H | N | Y | M |
| 39 | M | M | H | Y | N | M |
| 40 | M | M | H | Y | Y | M |
| 41 | M | H | L | N | N | H |
| 42 | M | H | L | N | Y | M |
| 43 | M | H | L | Y | N | M |
| 44 | M | H | L | Y | Y | L |
| 45 | M | H | H | N | N | H |
| 46 | M | H | H | N | Y | M |
| 47 | M | H | H | Y | N | M |
| 48 | M | H | H | Y | Y | L |
| 49 | H | L | L | N | N | H |
| 50 | H | L | L | N | Y | M |
| 51 | H | L | L | Y | N | M |
| 52 | H | L | L | Y | Y | L |
| 53 | H | L | H | N | N | H |

| **Rule No.** | **SLA** | **PP** | **SR** | **SI** | **VM** | **Overall Trust** |
| --- | --- | --- | --- | --- | --- | --- |
| 54 | H | L | H | N | Y | M |
| 55 | H | L | H | Y | N | M |
| 56 | H | L | H | Y | Y | L |
| 57 | H | M | L | N | N | H |
| 58 | H | M | L | N | Y | M |
| 59 | H | M | L | Y | N | M |
| 60 | H | M | L | Y | Y | L |
| 61 | H | M | H | N | N | H |
| 62 | H | M | H | N | Y | H |
| 63 | H | M | H | Y | N | H |
| 64 | H | M | H | Y | Y | M |
| 65 | H | H | L | N | N | H |
| 66 | H | H | L | N | Y | M |
| 67 | H | H | L | Y | N | M |
| 68 | H | H | L | Y | Y | M |
| 69 | H | H | H | N | Y | H |
| 70 | H | H | H | Y | N | H |
| 71 | H | H | H | Y | Y | M |
| 72 | H | H | H | N | N | Excellent |
