# Supplementary material for: Fuzzy logic trust management framework for Cyber Physical-Social Systems (FTM-CPSS)
Source: PeerJ journal article supplement (doi:10.7717/peerj-cs.3164), 2025-12-16
Supplement: Matlab_output.docx [file Matlab_output.docx]

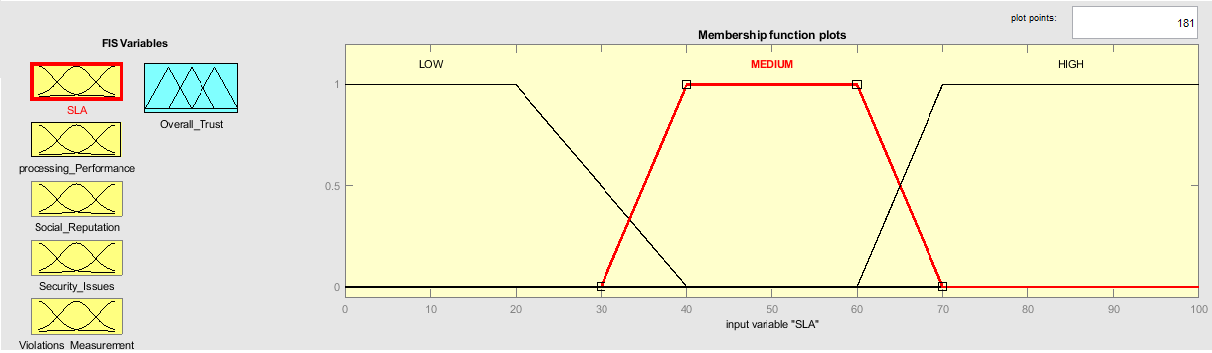


FIS input variables membership functions.


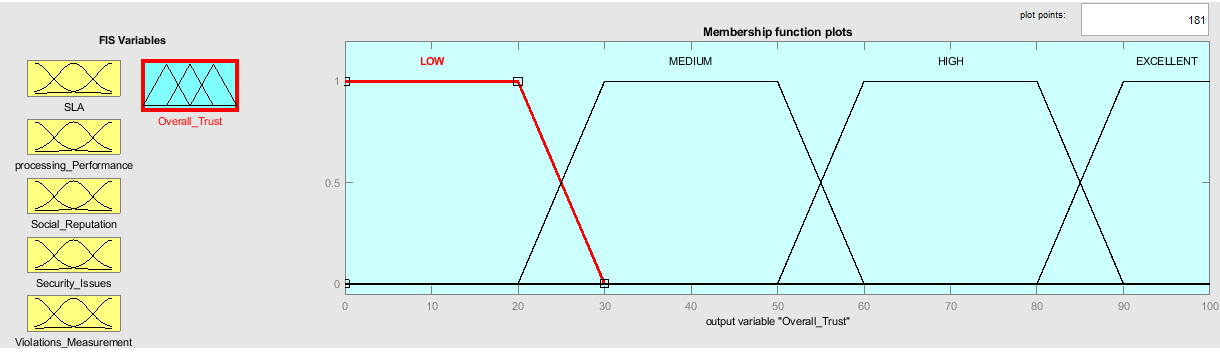


FIS Output Membership Functions.


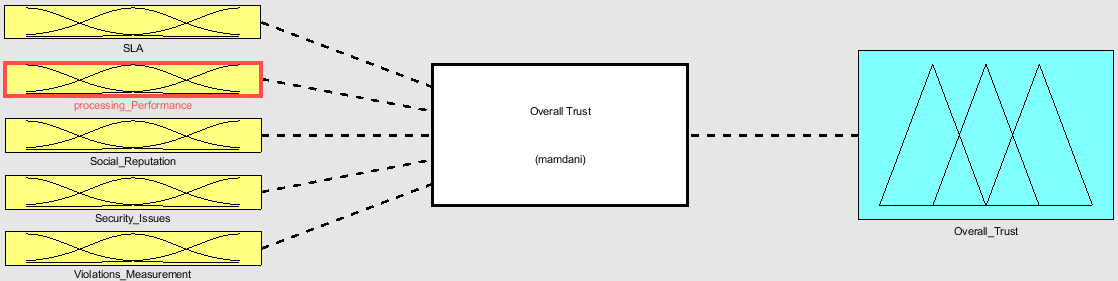


FIS Overall Trust


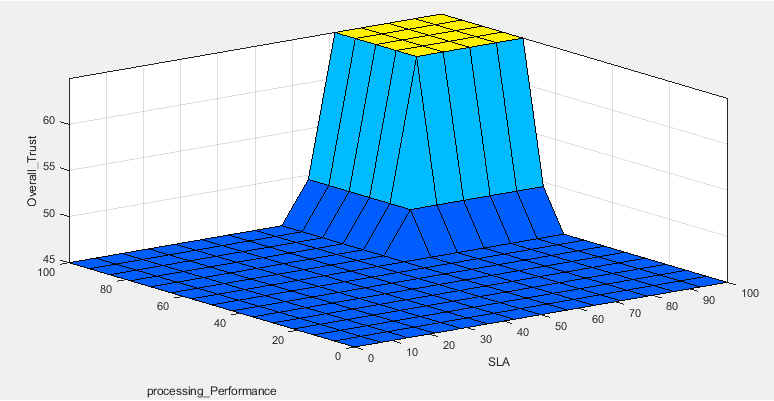


Surface view of processing performance and SLA evaluations verses overall trust.


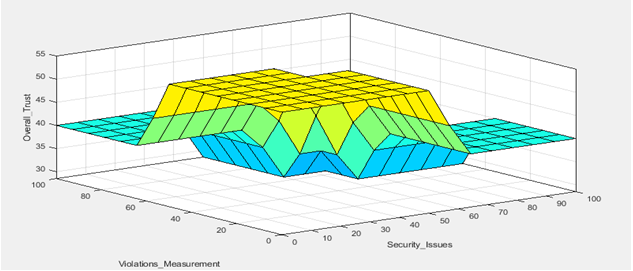


Surface view of security issues and violation measurement verses overall trust.
