# Supplementary figures and images for: Fuzzy logic trust management framework for Cyber Physical-Social Systems (FTM-CPSS)
Source: PeerJ journal article supplement (doi:10.7717/peerj-cs.3164), 2025-12-16

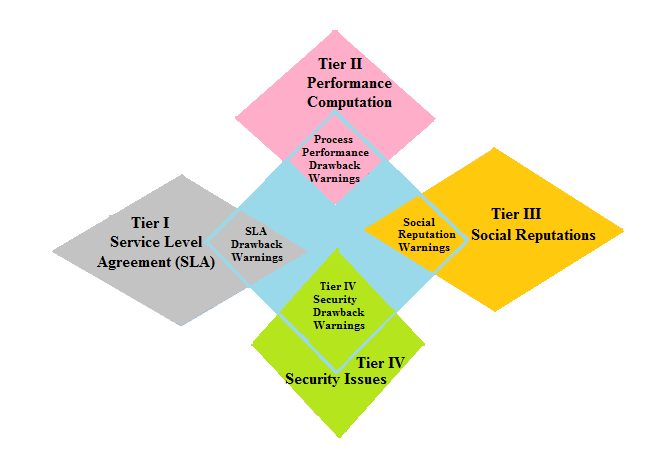


Tier V -Violations Measurement

Supplement: Violations.docx [file Violations.docx]

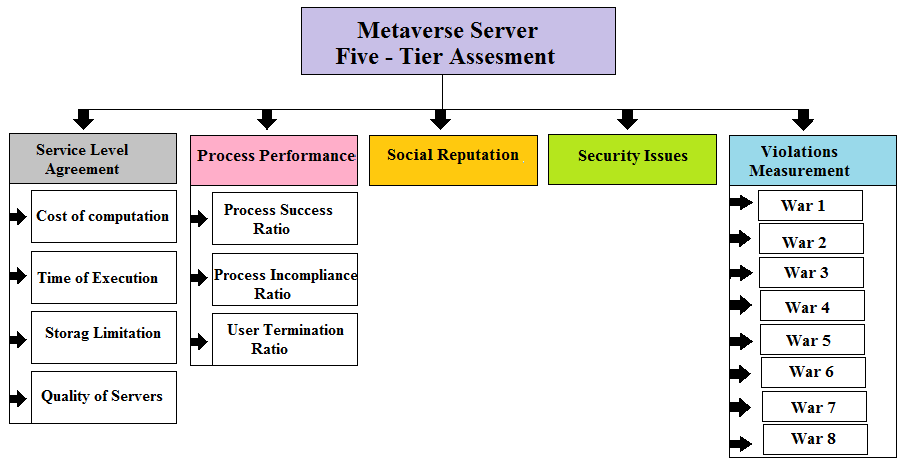


Section I- five -tier trust computation attributes.

Supplement: five_tier_trust_computation_attributes.docx [file five_tier_trust_computation_attributes.docx]

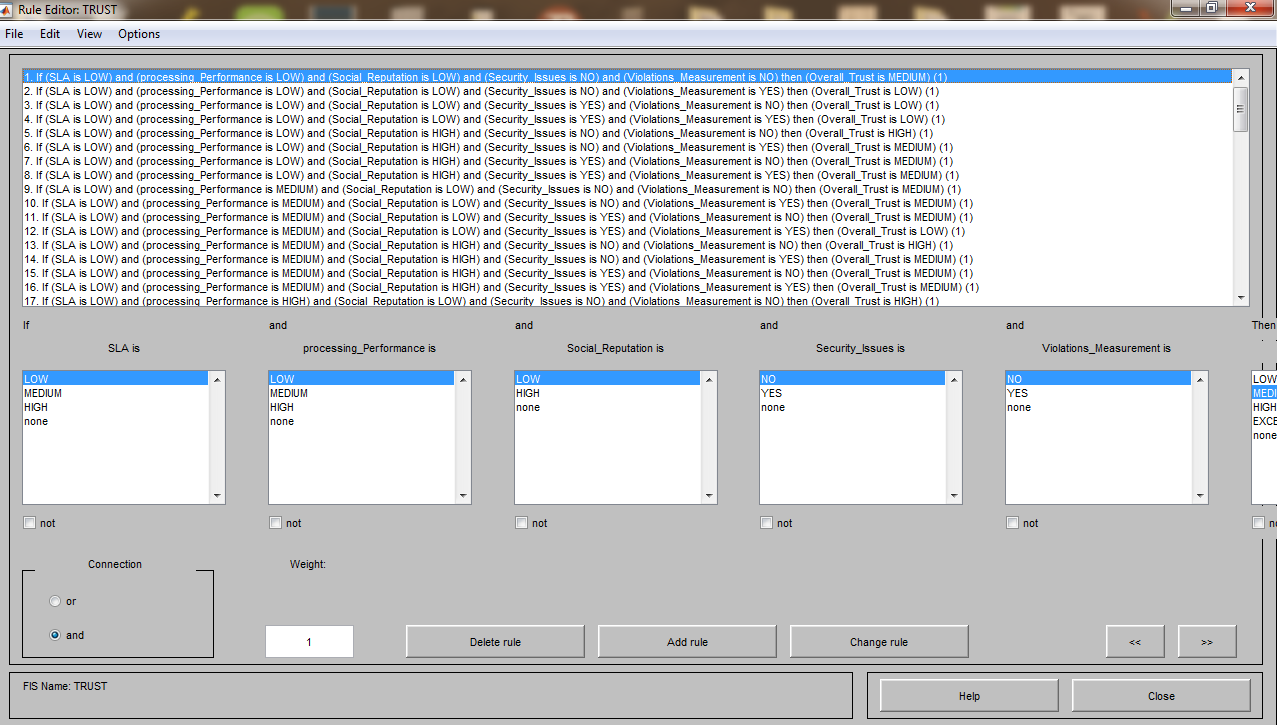


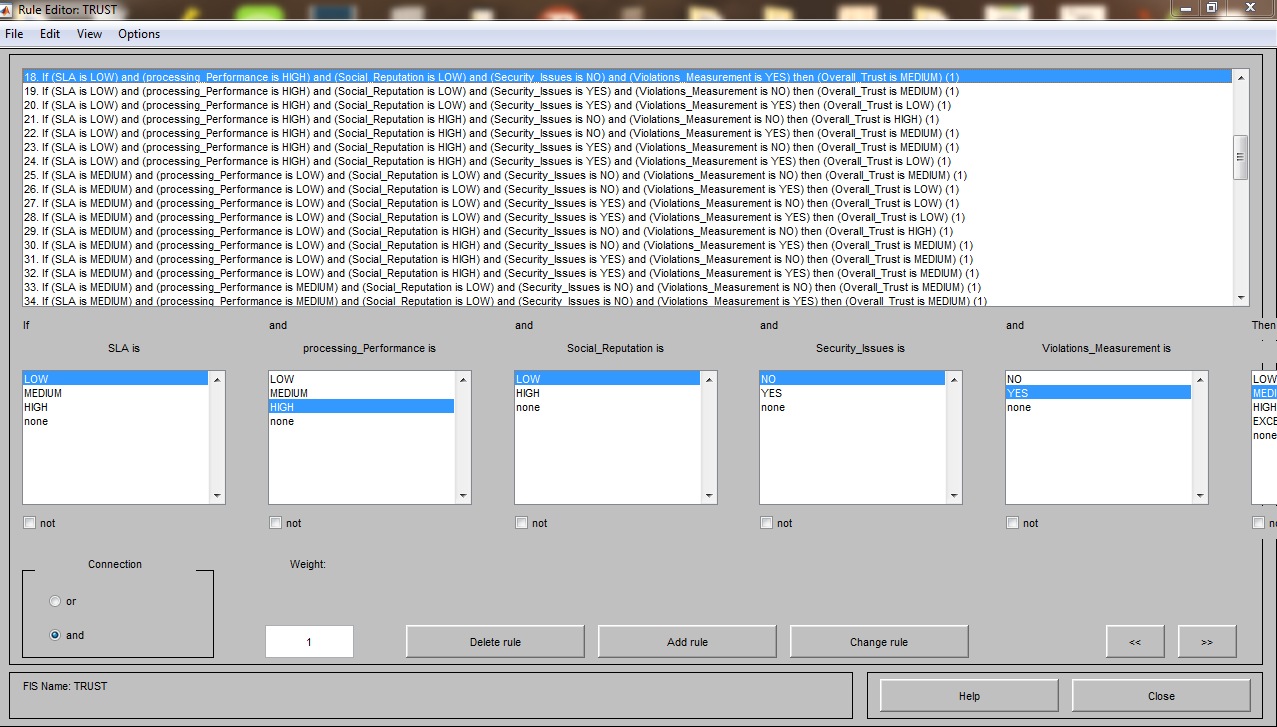


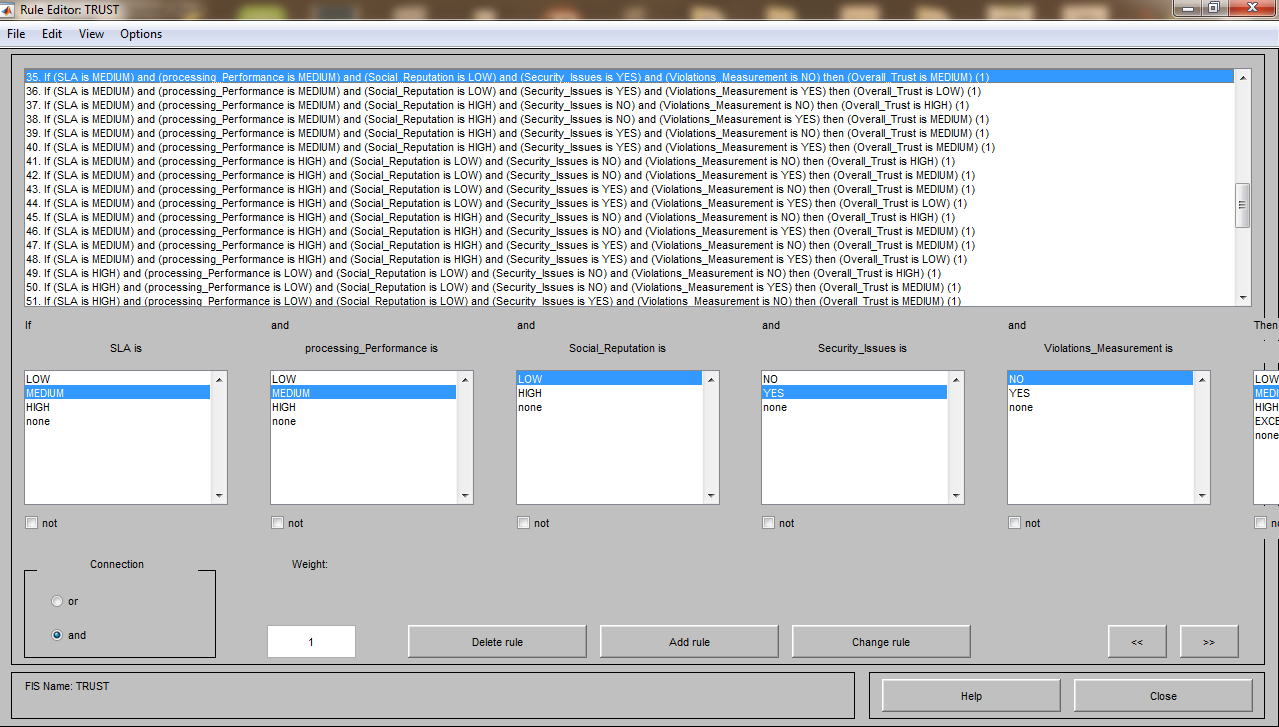


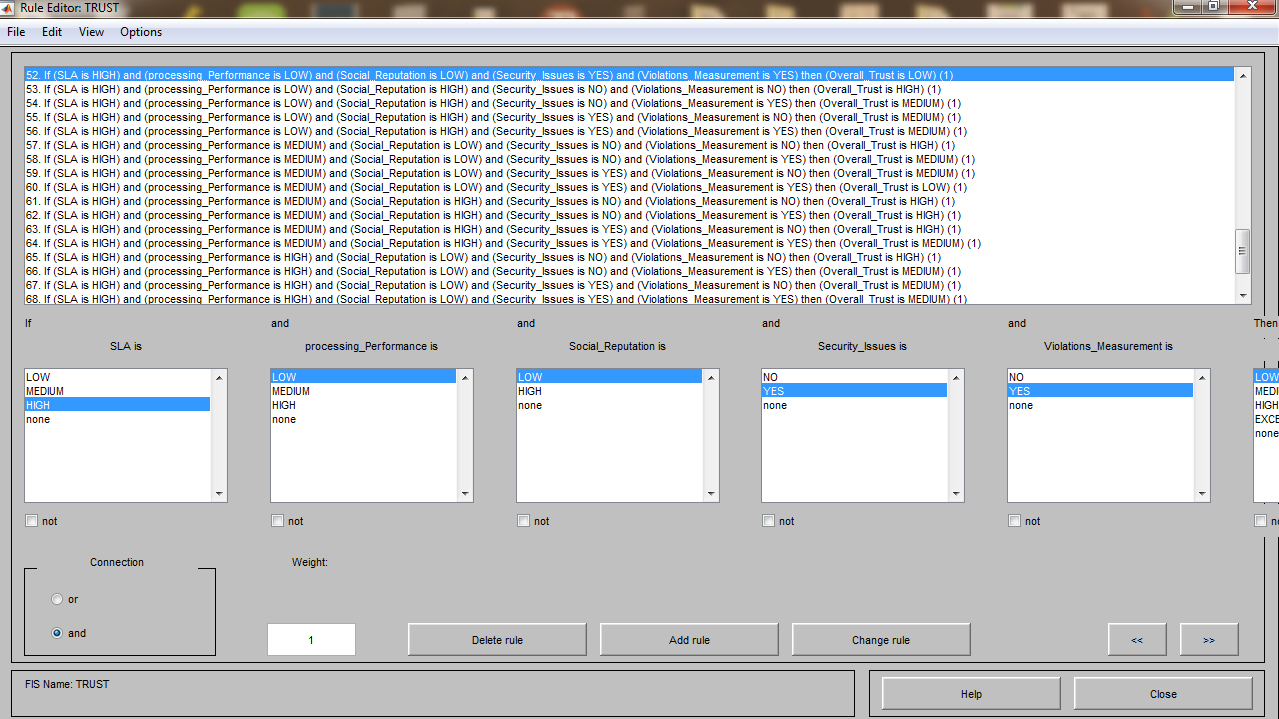


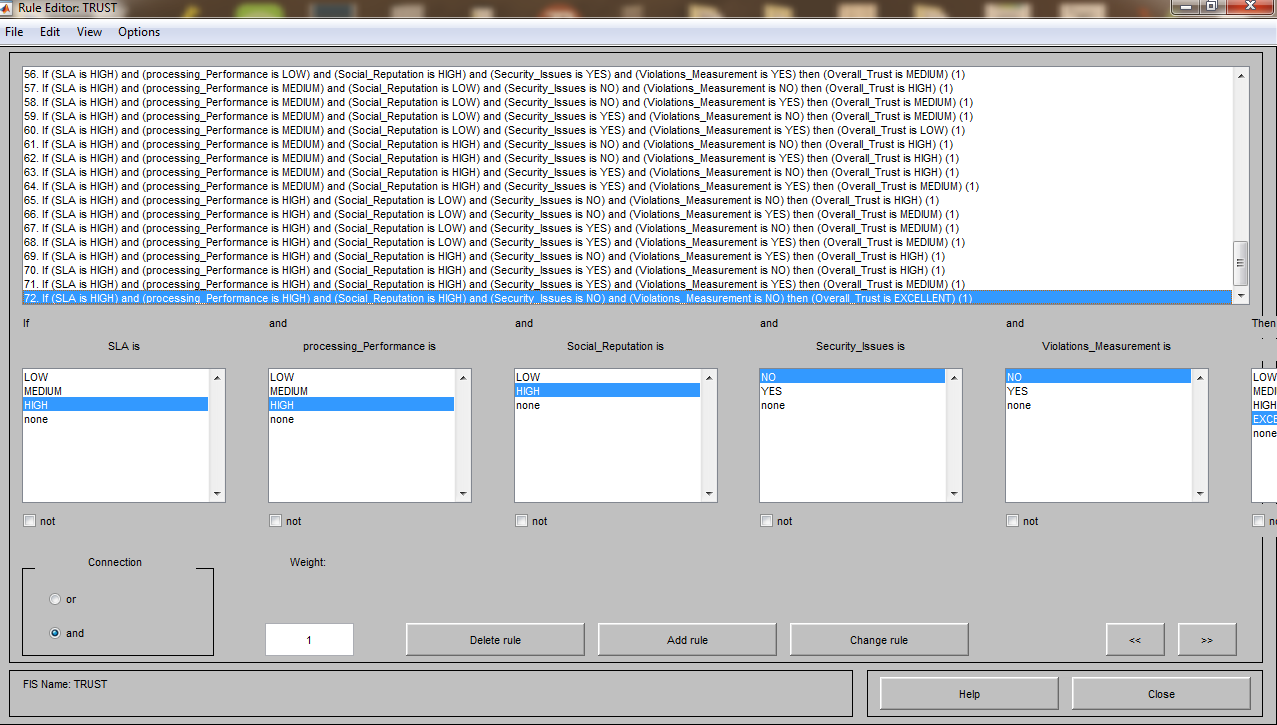

Supplement: ifthenRules.docx [file ifthenRules.docx]
